# Supplementary material
Source: publisher figshare collection journal article supplement (https://gsajournals.figshare.com/ndownloader/files/11283047)
Supplement: Supplementary file 1 [file 11283047]

## Sheet: TY Gag-Pol
			YHE1609	YHE1608	YHE1609	YHE1609
	1		[URE3] -Ade	[ure-o]	[URE3]	[URE3]
# Tys	repeats		-Ade		+Ade 1st	+Ade 2nd		Description	chromosome
	2		Gene Counts	Gene Counts	Gene Counts	Gene Counts	ORF length			start	end
	unique
1	1	YBL005W-B	123797	38664	83062	33655	5269	Retrotransposon TYA Gag and TYB Pol genes; transcribed/translated as one unit; polyprotein is processed to make a nucleocapsid-like protein (Gag), reverse transcriptase (RT), protease (PR), and integrase (IN); similar to retroviral genes	chrII	221330	226598
	2	YBL005W-B	257	338	440	212
2	1	YBL100W-B	205004	179175	169756	92108	5314	Retrotransposon TYA Gag and TYB Pol genes; transcribed/translated as one unit; polyprotein is processed to make a nucleocapsid-like protein (Gag), reverse transcriptase (RT), protease (PR), and integrase (IN); similar to retroviral genes	chrII	29935	35248
	2	YBL100W-B	441	951	829	580
3	1	YBR012W-B	50134	35389	46373	19753	5272	Retrotransposon TYA Gag and TYB Pol genes; transcribed/translated as one unit; polyprotein is processed to make a nucleocapsid-like protein (Gag), reverse transcriptase (RT), protease (PR), and integrase (IN); similar to retroviral genes	chrII	259869	265140
	2	YBR012W-B	196	290	311	166
4	1	YCL019W	318352	268401	243797	144120	5314	Retrotransposon TYA Gag and TYB Pol genes; transcribed/translated as one unit; polyprotein is processed to make a nucleocapsid-like protein (Gag), reverse transcriptase (RT), protease (PR), and integrase (IN); similar to retroviral genes	chrIII	85102	90415
	2	YCL019W	575	1106	958	695
5	1	YDR034C-D	255953	264405	236143	144597	5314	Retrotransposon TYA Gag and TYB Pol genes; transcribed/translated as one unit; polyprotein is processed to make a nucleocapsid-like protein (Gag), reverse transcriptase (RT), protease (PR), and integrase (IN); similar to retroviral genes	chrIV	519356	514043
	2	YDR034C-D	581	1120	1021	717
6	1	YDR098C-B	85120	48477	63671	29054	5269	Retrotransposon TYA Gag and TYB Pol genes; transcribed/translated as one unit; polyprotein is processed to make a nucleocapsid-like protein (Gag), reverse transcriptase (RT), protease (PR), and integrase (IN); similar to retroviral genes	chrIV	651126	645858
	2	YDR098C-B	270	422	448	246
7	1	YDR210C-D	64634	37824	48747	24386	5269	Retrotransposon TYA Gag and TYB Pol genes; transcribed/translated as one unit; polyprotein is processed to make a nucleocapsid-like protein (Gag), reverse transcriptase (RT), protease (PR), and integrase (IN); similar to retroviral genes	chrIV	883927	878659
	2	YDR210C-D	215	339	367	191
8	1	YDR210W-B	207800	218928	200223	116940	5314	Retrotransposon TYA Gag and TYB Pol genes; transcribed/translated as one unit; polyprotein is processed to make a nucleocapsid-like protein (Gag), reverse transcriptase (RT), protease (PR), and integrase (IN); similar to retroviral genes	chrIV	872112	877425
	2	YDR210W-B	512	1021	913	623
9	1	YDR261C-D	86170	57501	71306	28941	4816	Retrotransposon TYA Gag and TYB Pol genes; Gag processing produces capsid proteins, Pol is cleaved to produce protease, reverse transcriptase and integrase activities; in YDRCTy1-3 TYB is mutant and probably non-functional	chrIV	992349	987534
	2	YDR261C-D	222	410	419	254
10	1	YDR261W-B	194006	208277	196228	120932	5314	Retrotransposon TYA Gag and TYB Pol genes; transcribed/translated as one unit; polyprotein is processed to make a nucleocapsid-like protein (Gag), reverse transcriptase (RT), protease (PR), and integrase (IN); similar to retroviral genes	chrIV	981462	986775
	2	YDR261W-B	532	1068	945	660
11	1	YDR316W-B	45793	26494	37017	17271	5269	Retrotransposon TYA Gag and TYB Pol genes; transcribed/translated as one unit; polyprotein is processed to make a nucleocapsid-like protein (Gag), reverse transcriptase (RT), protease (PR), and integrase (IN); similar to retroviral genes	chrIV	1096064	1101332
	2	YDR316W-B	182	288	317	181
12	1	YDR365W-B	39450	33008	40455	13251	5269	Retrotransposon TYA Gag and TYB Pol genes; transcribed/translated as one unit; polyprotein is processed to make a nucleocapsid-like protein (Gag), reverse transcriptase (RT), protease (PR), and integrase (IN); similar to retroviral genes	chrIV	1206997	1212265
	2	YDR365W-B	130	265	258	146
13	1	YER138C	92806	62130	73798	32374	5269	Retrotransposon TYA Gag and TYB Pol genes; transcribed/translated as one unit; polyprotein is processed to make a nucleocapsid-like protein (Gag), reverse transcriptase (RT), protease (PR), and integrase (IN); similar to retroviral genes	chrV	449024	443756
	2	YER138C	259	476	467	283
14	1	YER160C	94758	56858	73690	30441	5269	Retrotransposon TYA Gag and TYB Pol genes; transcribed/translated as one unit; polyprotein is processed to make a nucleocapsid-like protein (Gag), reverse transcriptase (RT), protease (PR), and integrase (IN); similar to retroviral genes	chrV	498124	492856
	2	YER160C	256	384	428	237
15	1	YFL002W-A	259291	262611	233007	138986	5314	Retrotransposon TYA Gag and TYB Pol genes; transcribed/translated as one unit; polyprotein is processed to make a nucleocapsid-like protein (Gag), reverse transcriptase (RT), protease (PR), and integrase (IN); similar to retroviral genes	chrVI	138204	143517
	2	YFL002W-A	571	1105	940	691
16	1	YGR027W-B	64600	72473	81838	29188	5269	Retrotransposon TYA Gag and TYB Pol genes; transcribed/translated as one unit; polyprotein is processed to make a nucleocapsid-like protein (Gag), reverse transcriptase (RT), protease (PR), and integrase (IN); similar to retroviral genes	chrVII	536057	541325
	2	YGR027W-B	190	329	324	197
17	1	YGR038C-B	83114	44370	59478	29286	5269	Retrotransposon TYA Gag and TYB Pol genes; transcribed/translated as one unit; polyprotein is processed to make a nucleocapsid-like protein (Gag), reverse transcriptase (RT), protease (PR), and integrase (IN); similar to retroviral genes	chrVII	567467	562199
	2	YGR038C-B	249	402	439	258
18	1	YGR109W-B	138526	84060	89945	48057	4645	Retrotransposon TYA Gag and TYB Pol genes; transcribed/translated as one unit; polyprotein is processed to make a nucleocapsid-like protein (Gag), reverse transcriptase (RT), protease (PR), and integrase (IN); similar to retroviral genes	chrVII	707610	712254
	2	YGR109W-B	183	455	413	267
19	1	YGR161C-D	56537	34881	46500	19286	5269	Retrotransposon TYA Gag and TYB Pol genes; transcribed/translated as one unit; polyprotein is processed to make a nucleocapsid-like protein (Gag), reverse transcriptase (RT), protease (PR), and integrase (IN); similar to retroviral genes	chrVII	823015	817747
	2	YGR161C-D	217	328	359	208
20	1	YGR161W-B	259253	262347	232030	138927	5314	Retrotransposon TYA Gag and TYB Pol genes; transcribed/translated as one unit; polyprotein is processed to make a nucleocapsid-like protein (Gag), reverse transcriptase (RT), protease (PR), and integrase (IN); similar to retroviral genes	chrVII	811738	817051
	2	YGR161W-B	570	1087	941	687
21	1	YHL009W-B	40875	26576	22660	19472	5410	Retrotransposon TYA Gag and TYB Pol genes; transcribed/translated as one unit; polyprotein is processed to make a nucleocapsid-like protein (Gag), reverse transcriptase (RT), protease (PR), and integrase (IN); similar to retroviral genes	chrVIII	85909	91318
	2	YHL009W-B	106	273	225	146
22	1	YHR214C-B	96125	54430	84286	36545	5383	Retrotransposon TYA Gag and TYB Pol genes; transcribed/translated as one unit; polyprotein is processed to make a nucleocapsid-like protein (Gag), reverse transcriptase (RT), protease (PR), and integrase (IN); similar to retroviral genes; YHR214C-B has a paralog, YAR070C, that arose from a segmental duplication	chrVIII	549346	543964
	2	YHR214C-B	277	420	467	270
23	1	YIL082W-A	111821	69314	75395	44778	4498	Retrotransposon TYA Gag and TYB Pol genes; transcribed/translated as one unit; polyprotein is processed to make a nucleocapsid-like protein (Gag), reverse transcriptase (RT), protease (PR), and integrase (IN); similar to retroviral genes	chrIX	205635	210132
	2	YIL082W-A	168	403	361	230
24	1	YJL113W	31375	16581	14100	14040	4648	Retrotransposon TYA Gag and TYB Pol genes; transcribed/translated as one unit; polyprotein is processed to make a nucleocapsid-like protein (Gag), reverse transcriptase (RT), protease (PR), and integrase (IN); similar to retroviral genes	chrX	198678	203325
	2	YJL113W	75	197	166	105
25	1	YJR027W	38026	31843	39982	14764	5269	Retrotransposon TYA Gag and TYB Pol genes; transcribed/translated as one unit; polyprotein is processed to make a nucleocapsid-like protein (Gag), reverse transcriptase (RT), protease (PR), and integrase (IN); similar to retroviral genes	chrX	472760	478028
	2	YJR027W	140	268	268	140
26	1	YJR029W	67839	72941	85653	29649	5269	Retrotransposon TYA Gag and TYB Pol genes; transcribed/translated as one unit; polyprotein is processed to make a nucleocapsid-like protein (Gag), reverse transcriptase (RT), protease (PR), and integrase (IN); similar to retroviral genes	chrX	478344	483612
	2	YJR029W	188	337	340	209
27	1	YLR157C-B	85145	59597	68434	29889	5269	Retrotransposon TYA Gag and TYB Pol genes; transcribed/translated as one unit; polyprotein is processed to make a nucleocapsid-like protein (Gag), reverse transcriptase (RT), protease (PR), and integrase (IN); similar to retroviral genes	chrXII	481601	476333
	2	YLR157C-B	261	481	458	277
28	1	YLR227W-B	40121	31833	39471	14089	5269	Retrotransposon TYA Gag and TYB Pol genes; transcribed/translated as one unit; polyprotein is processed to make a nucleocapsid-like protein (Gag), reverse transcriptase (RT), protease (PR), and integrase (IN); similar to retroviral genes	chrXII	593438	598706
	2	YLR227W-B	134	248	237	125
29	1	YLR410W-B	303300	257997	229936	143999	5314	Retrotransposon TYA Gag and TYB Pol genes; transcribed/translated as one unit; polyprotein is processed to make a nucleocapsid-like protein (Gag), reverse transcriptase (RT), protease (PR), and integrase (IN); similar to retroviral genes	chrXII	941483	946796
	2	YLR410W-B	577	1110	993	700
30	1	YML039W	45513	33936	44017	15688	5269	Retrotransposon TYA Gag and TYB Pol genes; transcribed/translated as one unit; polyprotein is processed to make a nucleocapsid-like protein (Gag), reverse transcriptase (RT), protease (PR), and integrase (IN); similar to retroviral genes	chrXIII	196628	201896
	2	YML039W	154	287	271	166
31	1	YML045W	69006	38341	59492	22993	5269	Retrotransposon TYA Gag and TYB Pol genes; transcribed/translated as one unit; polyprotein is processed to make a nucleocapsid-like protein (Gag), reverse transcriptase (RT), protease (PR), and integrase (IN); similar to retroviral genes	chrXIII	184461	189729
	2	YML045W	199	313	351	208
32	1	YMR045C	142314	46989	91410	36376	5269	Retrotransposon TYA Gag and TYB Pol genes; transcribed/translated as one unit; polyprotein is processed to make a nucleocapsid-like protein (Gag), reverse transcriptase (RT), protease (PR), and integrase (IN); similar to retroviral genes	chrXIII	362627	357359
	2	YMR045C	282	376	474	246
33	1	YMR050C	94577	60309	73367	33541	5269	Retrotransposon TYA Gag and TYB Pol genes; transcribed/translated as one unit; polyprotein is processed to make a nucleocapsid-like protein (Gag), reverse transcriptase (RT), protease (PR), and integrase (IN); similar to retroviral genes	chrXIII	378325	373057
	2	YMR050C	258	428	455	259
34	1	YNL284C-B	246607	125457	250927	107170	5269	Retrotransposon TYA Gag and TYB Pol genes; transcribed/translated as one unit; polyprotein is processed to make a nucleocapsid-like protein (Gag), reverse transcriptase (RT), protease (PR), and integrase (IN); similar to retroviral genes	chrXIV	102232	96964
	2	YNL284C-B	450	639	785	436
35	1	YOL103W-B	44810	33755	44350	15565	5269	Retrotransposon TYA Gag and TYB Pol genes; transcribed/translated as one unit; polyprotein is processed to make a nucleocapsid-like protein (Gag), reverse transcriptase (RT), protease (PR), and integrase (IN); similar to retroviral genes	chrXV	118000	123268
	2	YOL103W-B	150	290	277	172
36	1	YOR142W-B	43459	34609	47516	17807	5269	Retrotransposon TYA Gag and TYB Pol genes; transcribed/translated as one unit; polyprotein is processed to make a nucleocapsid-like protein (Gag), reverse transcriptase (RT), protease (PR), and integrase (IN); similar to retroviral genes	chrXV	595112	600380
	2	YOR142W-B	167	265	289	163
37	1	YOR192C-B	192035	197804	181269	113870	5314	Retrotransposon TYA Gag and TYB Pol genes; transcribed/translated as one unit; polyprotein is processed to make a nucleocapsid-like protein (Gag), reverse transcriptase (RT), protease (PR), and integrase (IN); similar to retroviral genes	chrXV	709732	704419
	2	YOR192C-B	525	1060	926	650
38	1	YOR343W-B	177764	190835	174943	105105	5314	Retrotransposon TYA Gag and TYB Pol genes; transcribed/translated as one unit; polyprotein is processed to make a nucleocapsid-like protein (Gag), reverse transcriptase (RT), protease (PR), and integrase (IN); similar to retroviral genes	chrXV	970578	975891
	2	YOR343W-B	472	947	852	576
39	1	YPL257W-B	42579	32668	41432	13917	5269	Retrotransposon TYA Gag and TYB Pol genes; transcribed/translated as one unit; polyprotein is processed to make a nucleocapsid-like protein (Gag), reverse transcriptase (RT), protease (PR), and integrase (IN); similar to retroviral genes	chrXVI	56748	62016
	2	YPL257W-B	151	300	269	166
40	1	YPR137C-B	92859	90180	107282	41150	5269	Retrotransposon TYA Gag and TYB Pol genes; transcribed/translated as one unit; polyprotein is processed to make a nucleocapsid-like protein (Gag), reverse transcriptase (RT), protease (PR), and integrase (IN); similar to retroviral genes	chrXVI	810269	805001
	2	YPR137C-B	244	428	441	271
41	1	YPR158C-D	60266	52992	61286	24695	5269	Retrotransposon TYA Gag and TYB Pol genes; transcribed/translated as one unit; polyprotein is processed to make a nucleocapsid-like protein (Gag), reverse transcriptase (RT), protease (PR), and integrase (IN); similar to retroviral genes	chrXVI	856257	850989
	2	YPR158C-D	230	391	391	235
42	1	YPR158W-B	51799	38459	50795	21241	5272	Retrotransposon TYA Gag and TYB Pol genes; transcribed/translated as one unit; polyprotein is processed to make a nucleocapsid-like protein (Gag), reverse transcriptase (RT), protease (PR), and integrase (IN); similar to retroviral genes	chrXVI	844709	849980
	2	YPR158W-B	189	317	337	197

## Sheet: TY type
	Sequence Reads						Unique Insertions
	YHE1609	YHE1608	YHE1609	YHE1609			YHE1609	YHE1608	YHE1609	YHE1609
	[URE3]	[ure-o]	[URE3]	[URE3]			[URE3]	[ure-o]	[URE3]	[URE3]
	-Ade		+Ade 1st	+Ade 2nd			-Ade		+Ade 1st	+Ade 2nd
	Gene Counts	Gene Counts	Gene Counts	Gene Counts			Gene Counts	Gene Counts	Gene Counts	Gene Counts
YBL005W-B	123797	38664	83062	33655		YBL005W-B	257	338	440	212		TY1-1
YBL100W-B	205004	179175	169756	92108		YBL100W-B	441	951	829	580		TY2-1
YBR012W-B	50134	35389	46373	19753		YBR012W-B	196	290	311	166		TY1-2
YCL019W	318352	268401	243797	144120		YCL019W	575	1106	958	695		TY2-1
YDR034C-D	255953	264405	236143	144597		YDR034C-D	581	1120	1021	717		TY2-1
YDR098C-B	85120	48477	63671	29054		YDR098C-B	270	422	448	246		TY1-1
YDR210C-D	64634	37824	48747	24386		YDR210C-D	215	339	367	191		TY1-2
YDR210W-B	207800	218928	200223	116940		YDR210W-B	512	1021	913	623		TY2-2
YDR261C-D	86170	57501	71306	28941		YDR261C-D	222	410	419	254		TY1-3
YDR261W-B	194006	208277	196228	120932		YDR261W-B	532	1068	945	660		TY2-3
YDR316W-B	45793	26494	37017	17271		YDR316W-B	182	288	317	181		TY1-4
YDR365W-B	39450	33008	40455	13251		YDR365W-B	130	265	258	146		TY1-5
YER138C	92806	62130	73798	32374		YER138C	259	476	467	283		TY1-1
YER160C	94758	56858	73690	30441		YER160C	256	384	428	237		TY1-2
YFL002W-A	259291	262611	233007	138986		YFL002W-A	571	1105	940	691		TY2-1
YGR027W-B	64600	72473	81838	29188		YGR027W-B	190	329	324	197		TY1-1
YGR038C-B	83114	44370	59478	29286		YGR038C-B	249	402	439	258		TY1-2
YGR109W-B	138526	84060	89945	48057		YGR109W-B	183	455	413	267		TY3-1
YGR161C-D	56537	34881	46500	19286		YGR161C-D	217	328	359	208		TY1-3
YGR161W-B	259253	262347	232030	138927		YGR161W-B	570	1087	941	687		TY2-2
YHL009W-B	40875	26576	22660	19472		YHL009W-B	106	273	225	146		TY4-1
YHR214C-B	96125	54430	84286	36545		YHR214C-B	277	420	467	270		TY1-1
YIL082W-A	111821	69314	75395	44778		YIL082W-A	168	403	361	230		TY3-1
YJL113W	31375	16581	14100	14040		YJL113W	75	197	166	105		TY4-1
YJR027W	38026	31843	39982	14764		YJR027W	140	268	268	140		TY1-2
YJR029W	67839	72941	85653	29649		YJR029W	188	337	340	209		TY1-2
YLR157C-B	85145	59597	68434	29889		YLR157C-B	261	481	458	277		TY1-1
YLR227W-B	40121	31833	39471	14089		YLR227W-B	134	248	237	125		TY1-2
YLR410W-B	303300	257997	229936	143999		YLR410W-B	577	1110	993	700		TY2-1
YML039W	45513	33936	44017	15688		YML039W	154	287	271	166		TY1-2
YML045W	69006	38341	59492	22993		YML045W	199	313	351	208		TY1-1
YMR045C	142314	46989	91410	36376		YMR045C	282	376	474	246		TY1-3
YMR050C	94577	60309	73367	33541		YMR050C	258	428	455	259		TY1-4
YNL284C-B	246607	125457	250927	107170		YNL284C-B	450	639	785	436		TY1-1
YOL103W-B	44810	33755	44350	15565		YOL103W-B	150	290	277	172		TY1-1
YOR142W-B	43459	34609	47516	17807		YOR142W-B	167	265	289	163		TY1-2
YOR192C-B	192035	197804	181269	113870		YOR192C-B	525	1060	926	650		TY2-1
YOR343W-B	177764	190835	174943	105105		YOR343W-B	472	947	852	576		TY2-2
YPL257W-B	42579	32668	41432	13917		YPL257W-B	151	300	269	166		TY1-1
YPR137C-B	92859	90180	107282	41150		YPR137C-B	244	428	441	271		TY1-2
YPR158C-D	60266	52992	61286	24695		YPR158C-D	230	391	391	235		TY1-4
YPR158W-B	51799	38459	50795	21241		YPR158W-B	189	317	337	197		TY1-3
